# Supplementary material for: Whole Transcriptomic Analysis Provides Insights into Molecular Mechanisms for Toxin Biosynthesis in a Toxic Dinoflagellate Alexandrium catenella (ACHK-T)
Source: MDPI journal article supplement (doi:10.3390/toxins9070213), 2017-07-05
Supplement: s1 [file s1]

# Supplementary Materials: Whole Transcriptomic Analysis Provides Insights into Molecular Mechanisms for Toxin Biosynthesis in the Toxic Dinoflagellate *Alexandrium catenella* (ACHK-T)

Yong Zhang, Shu-Fei Zhang, Lin Lin and Da-Zhi Wang

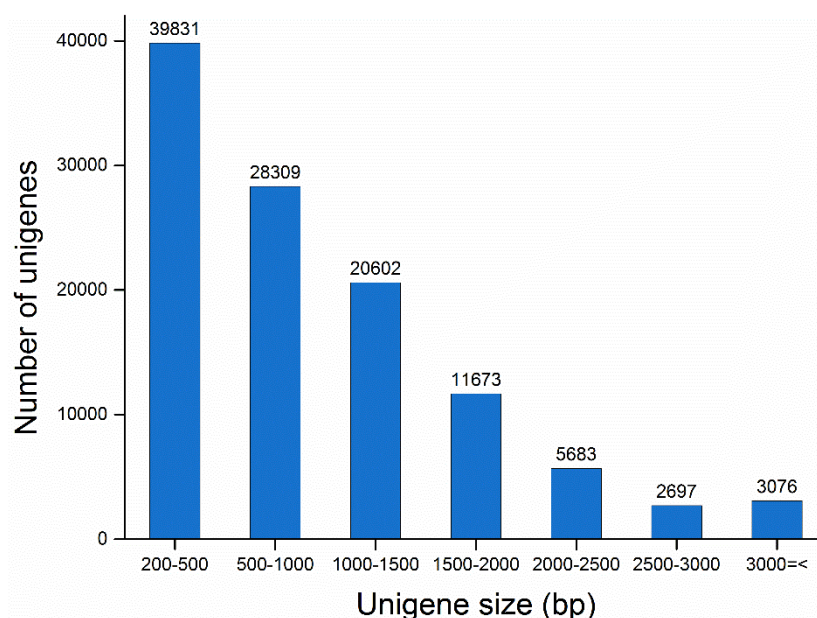

**Figure S1.** Length distribution of all unigenes. The Y-axis indicated the number of unigenes in the corresponding size of sequence length.

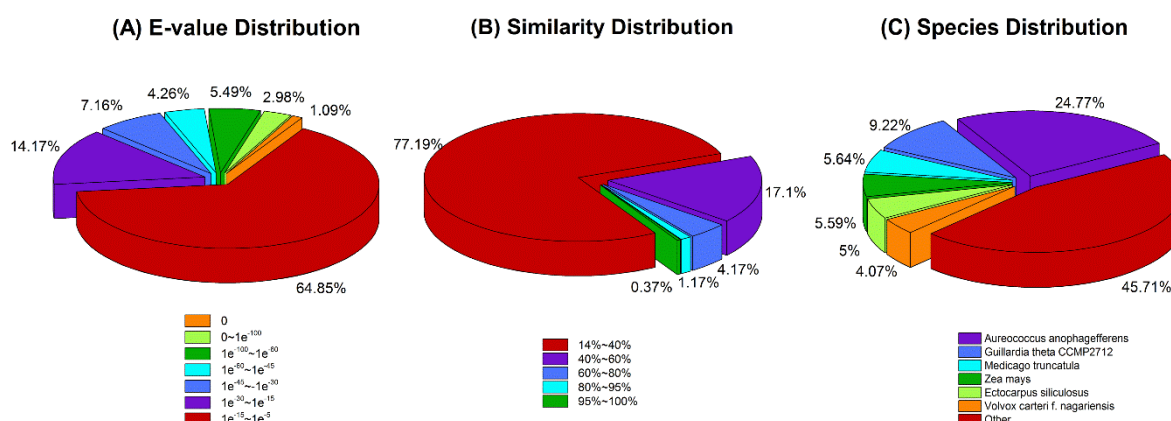

**Figure S2.** Summary of homology analysis against the NR database. All the unigenes with annotations under a threshold of  $e\text{-value} \leq 1 \times 10^{-5}$  were analysed for (A) e-value distribution of BLAST hits. (B) Similarity distribution of the top BLAST hits. (C) Species distribution.

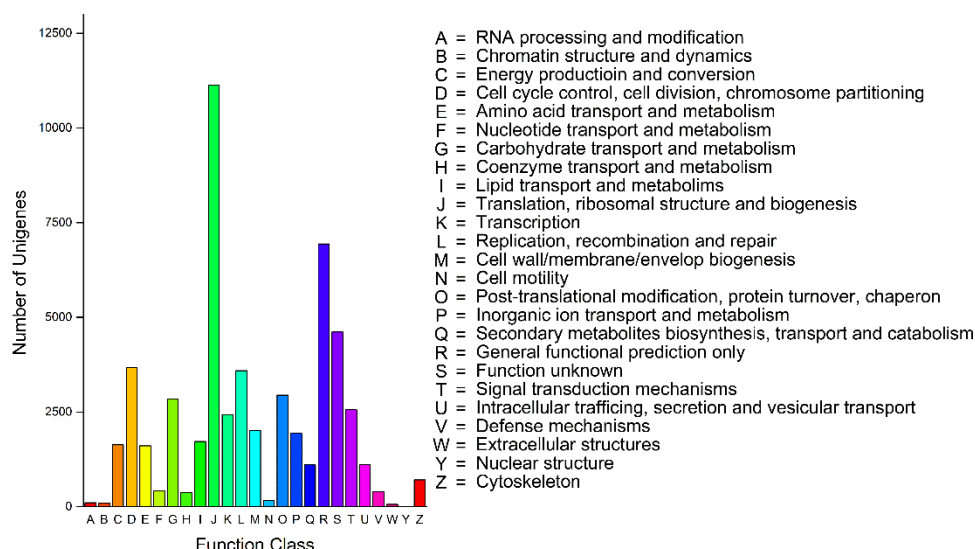

**Figure S3.** COG classification of *A. catenella* unigenes. Totally, 45,162 unigenes were categorized into 25 COG groups.

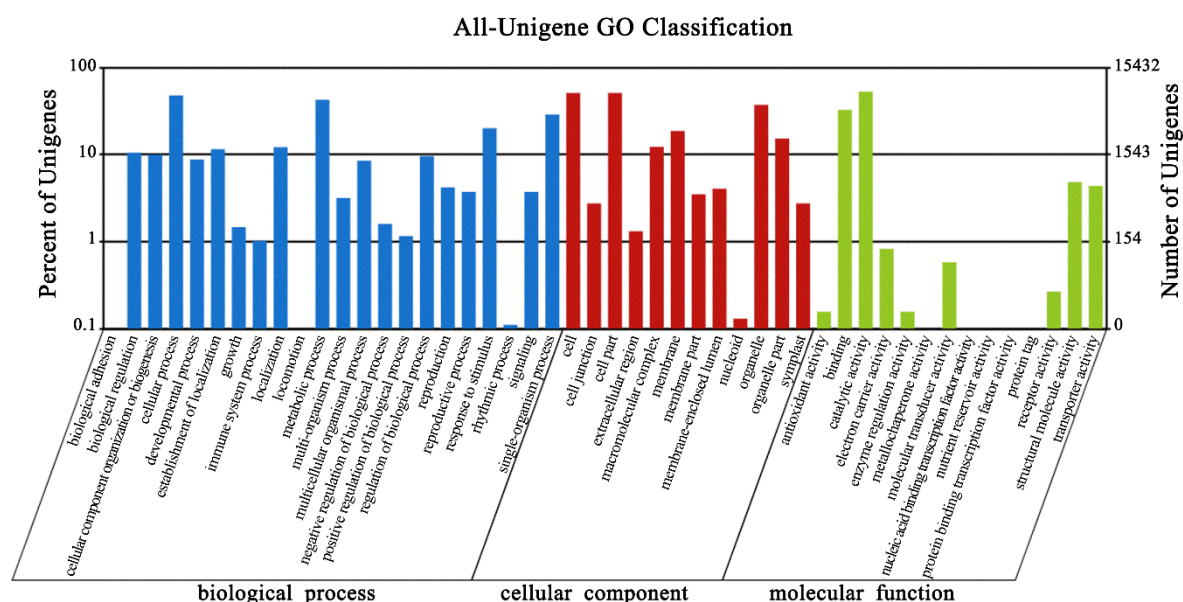

**Figure S4.** Histogram presentation of GO classification for all unigenes. A total of 15,432 unigenes were assigned to three main categories: biological process, cellular component and molecular function. The Y-axis indicated the percent and number of unigenes within each subcategories.

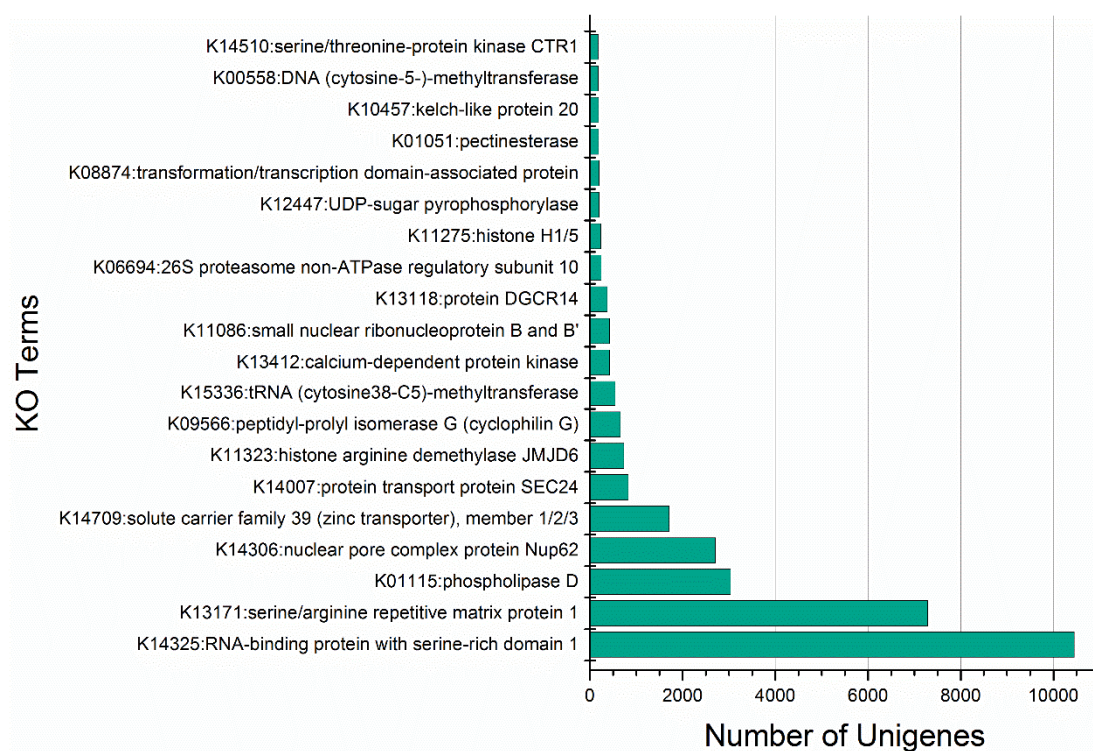

**Figure S5.** KO annotations of unigenes. Top 20 KO terms with number of unigenes assigned to each term.

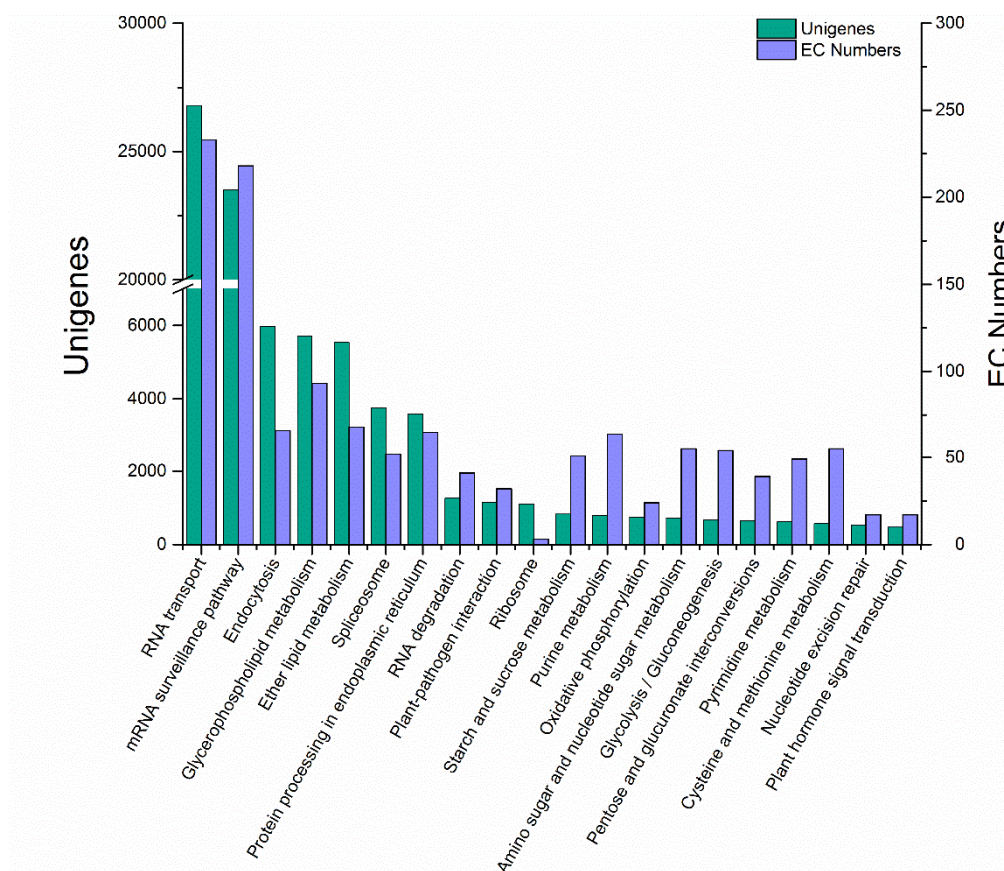

**Figure S6.** KEGG pathway annotation. The top 20 represented KEGG pathways with numbers of unigenes and EC number within each pathway.

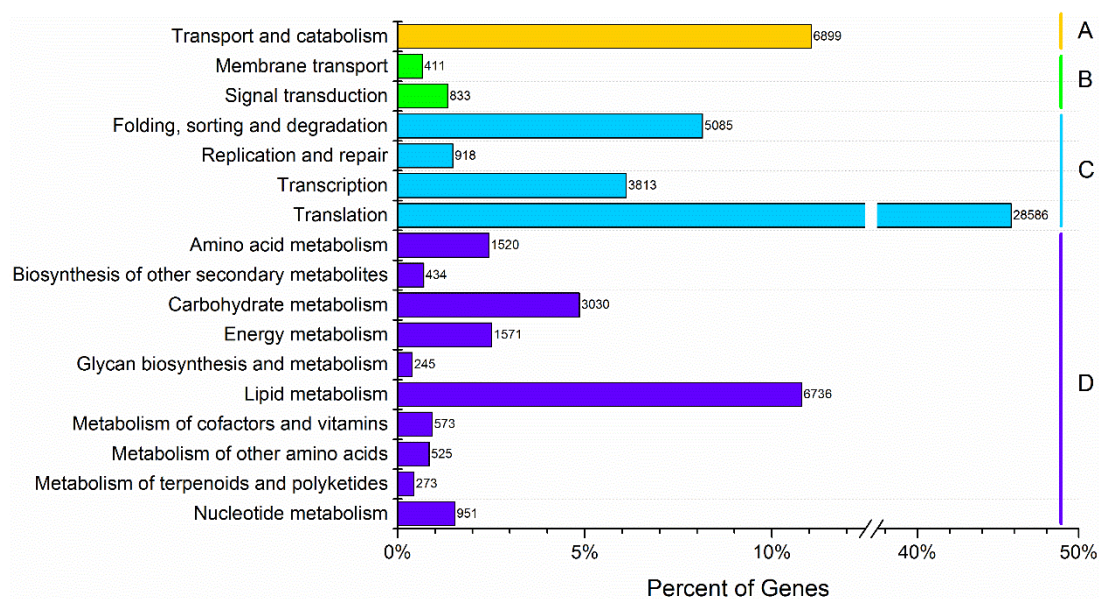

**Figure S7.** KEGG classification of unigenes based on the secondary pathway hierarchy. Letters correspond to the primary hierarchy, A: Cellular Processes; B: Environmental Information Processing; C: Genetic information Processing; D: Metabolism.



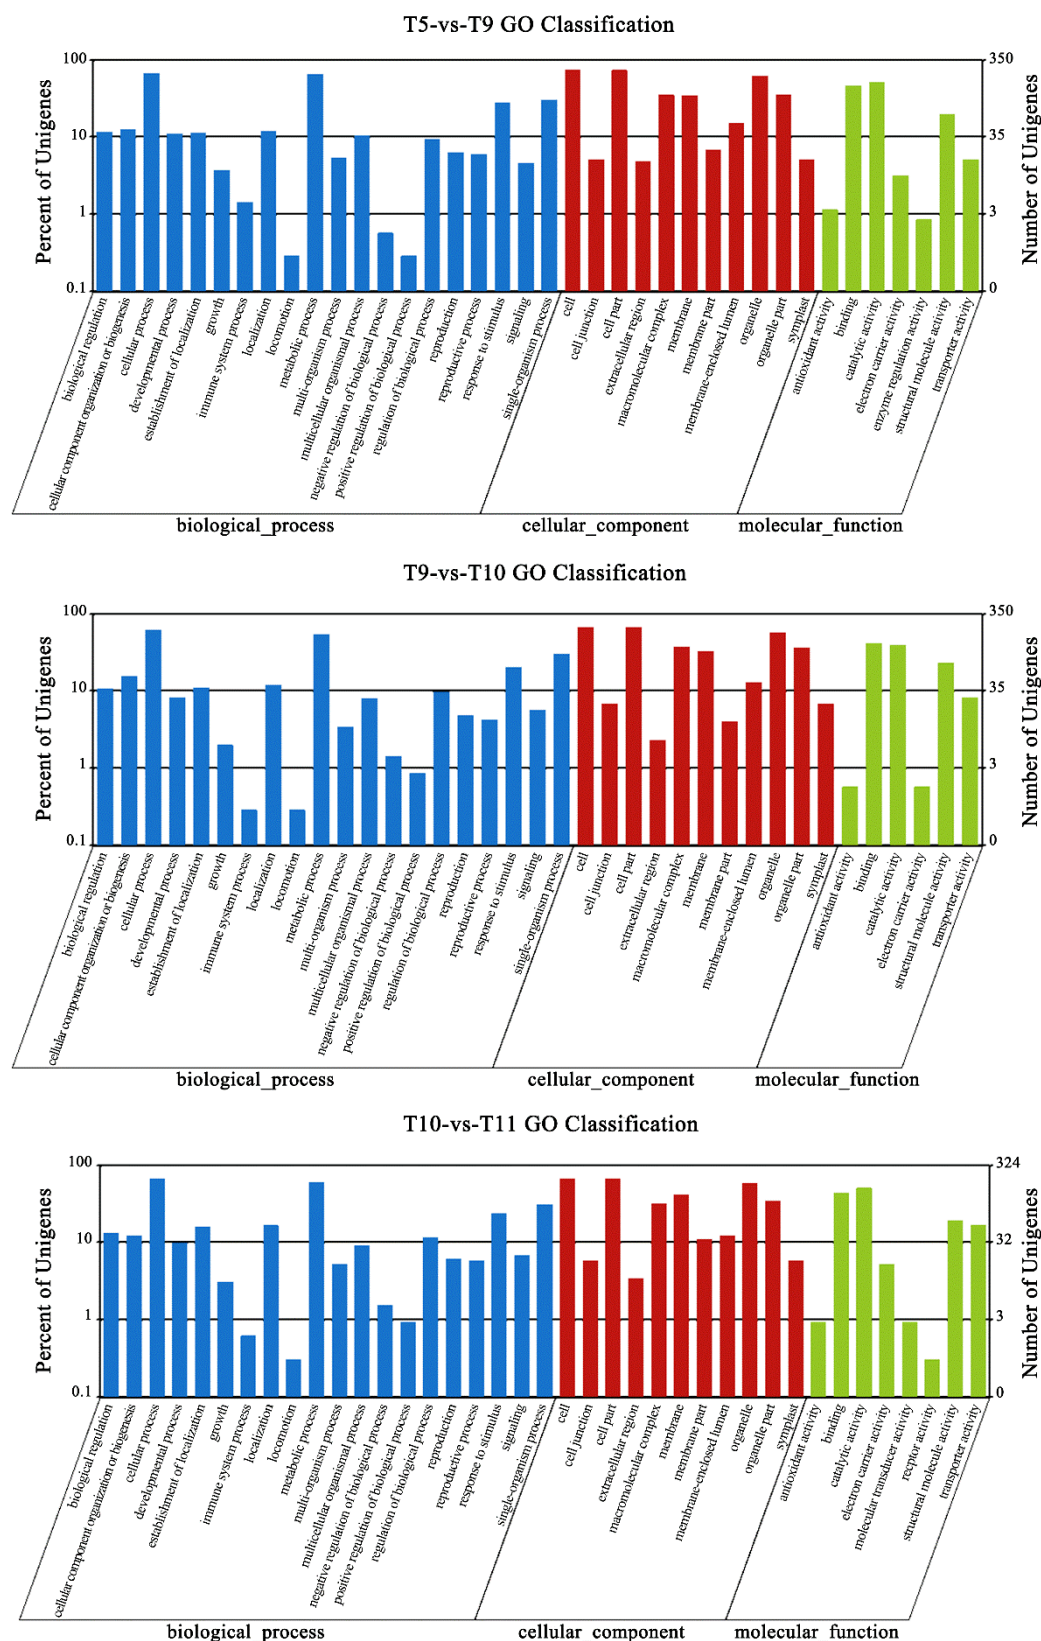

**Figure S8.** GO classification of DEGs in each comparison. For T5-vs-T9, T9-vs-T10 and T10-vs-T11831, 776 and 760 DEGs were categorized, respectively.

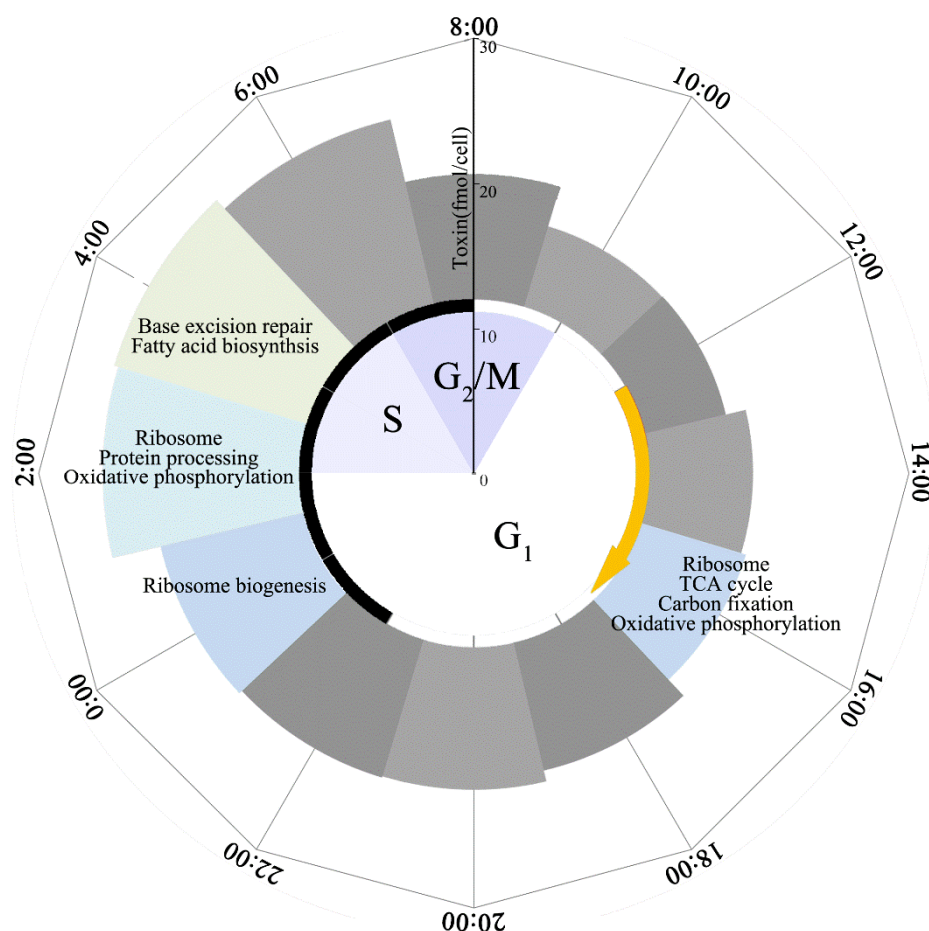

**Figure S9.** The proposed scheme illustrating cellular processing in different toxin biosynthesis stages within a cell cycle. The area of grey and light-coloured sectors represented the single cellular toxin concentration in each sampling time point.

**Table S1.** Summary of sequencing output and de novo assembly.

| Items                        | Value       |
|------------------------------|-------------|
| Total number of raw reads    | 480,981,760 |
| Total number of clean reads  | 435,543,566 |
| Total clean nucleotides (Gb) | 43.55       |
| Q20 percentage (%)           | 96.50~96.69 |
| GC percentage (%)            | 60.75~60.93 |
| Total number of transcripts  | 701,597     |
| Mean length of transcripts   | 554         |
| N50 length of transcripts    | 1,106       |
| Total number of unigenes     | 111,871     |
| Mean length of unigenes      | 993         |
| N50 length of unigenes       | 1,442       |

**Table S2.** Identified *sxtA* and *sxtG* and their expressions.

| Gene_ID            | Gene Length | T5_FPKM | T9_FPKM | T10_FPKM | T11_FPKM |
|--------------------|-------------|---------|---------|----------|----------|
| <i>sxtA</i> long:  |             |         |         |          |          |
| CL2951.Contig1_All | 1537        | 17.6161 | 19.0586 | 18.791   | 23.0346  |
| CL2951.Contig2_All | 1647        | 22.0835 | 20.5573 | 20.1706  | 20.728   |
| CL2951.Contig3_All | 220         | 21.9956 | 18.8725 | 18.5755  | 19.9163  |

|                    |      |         |         |         |         |
|--------------------|------|---------|---------|---------|---------|
| CL4218.Contig2_All | 2037 | 15.9439 | 19.966  | 15.0915 | 23.0744 |
| CL4218.Contig3_All | 1698 | 5.0104  | 5.1876  | 4.6106  | 5.8232  |
| Unigene14356_All   | 1749 | 61.0998 | 61.0656 | 55.5126 | 67.1983 |
| Unigene26180_All   | 1285 | 2.6273  | 2.6777  | 2.4298  | 3.5374  |
| Unigene51526_All   | 1072 | 29.3726 | 27.7108 | 26.9634 | 29.5729 |
| Unigene68071_All   | 4200 | 3.8959  | 2.7472  | 3.4274  | 3.7043  |
| Unigene77178_All   | 5379 | 5.1048  | 4.7891  | 3.3804  | 4.1948  |
| Unigene84411_All   | 908  | 2.1813  | 2.1726  | 2.1745  | 2.5289  |
| <i>sxtA</i> short: |      |         |         |         |         |
| Unigene44192_All   | 1546 | 3.7706  | 3.5314  | 3.3413  | 4.0012  |
| Unigene51437_All   | 3095 | 4.596   | 4.4988  | 3.9983  | 4.9663  |
| Unigene5533_All    | 3086 | 8.7884  | 9.2544  | 7.3503  | 10.159  |
| Unigene87971_All   | 200  | 1.2379  | 0.5735  | 1.6071  | 0.2343  |
| <i>sxtG</i> :      |      |         |         |         |         |
| CL1611.Contig1_All | 1237 | 4.8762  | 4.7473  | 4.6585  | 4.6597  |
| CL1611.Contig2_All | 1254 | 4.146   | 4.0061  | 3.863   | 3.4941  |
| Unigene10989_All   | 548  | 24.1089 | 37.799  | 22.6233 | 17.4877 |

---
